# Supplementary material for: Machine learning for the prediction of sepsis: a systematic review and meta-analysis of diagnostic test accuracy
Source: PubMed Central journal article supplement — Intensive Care Med. 2020 Jan 21;46(3):383–400. doi: 10.1007/s00134-019-05872-y (PMC7067741; doi:10.1007/s00134-019-05872-y), 2020-01-21
Supplement: 134_2019_5872_MOESM3_ESM.pdf [file 134_2019_5872_MOESM3_ESM.pdf]

**Online Resource 3.** Adapted QUADAS-2 questions

**Domain 1: Patient selection**

**Risk of bias: could the selection of patients have introduced bias?**

- Was a consecutive or random sample of patients enrolled?
- Was a case-control design avoided?
- Did the study avoid inappropriate exclusions?
- A clear objective and description of inclusion criteria of the study population?
- A detailed description of the study population?

**Domain 2: Index test**

**Risk of Bias: Could the Conduct or Interpretation of the Index Test Have Introduced Bias?**

- Were the outcomes measured in a valid and reliable way
- Was appropriate cross-validation and evaluation method used

**Domain 3: Reference standard**

**Risk of Bias: Could the Reference Standard, Its Conduct, or Its Interpretation Have Introduced Bias?**

- Is the reference standard likely to correctly classify the target condition?

**Domain 4: Flow and timing**

**Risk of Bias: Could the Patient Flow Have Introduced Bias?**

- Was there an appropriate interval between the index test and reference standard?
- Did all patients receive the same reference standard?
- Were all patients included in the analysis?

**Domain 5: Data management**

**Risk of Bias: Could data management have introduced bias?**

- A clear description of the data source and how data was collected
- A valid and reproducible data collection and measurement method
- Attainment of ethical approval
- Were findings and implications discussed in detail
