# Supplementary material for: Machine learning for the prediction of sepsis: a systematic review and meta-analysis of diagnostic test accuracy
Source: Springer Nature journal article supplement (doi:10.1007/s00134-019-05872-y), 2020-01-21
Supplement: MOESM2 [file 17792906]

## Online Resource 2. Factors in the up- and downgrading of the level of evidence

| Factor                                                                                                                                                                                                                                                                                                                                                                                                                                                                                                                                                                                                                       | Consequence                                                                               |
|------------------------------------------------------------------------------------------------------------------------------------------------------------------------------------------------------------------------------------------------------------------------------------------------------------------------------------------------------------------------------------------------------------------------------------------------------------------------------------------------------------------------------------------------------------------------------------------------------------------------------|-------------------------------------------------------------------------------------------|
| <p><i>Limitations in study design or execution (risk of bias)</i></p> <ul style="list-style-type: none"> <li>- All studies at unclear risk of bias (as all studies were scored to be at unclear risk of bias due to lack of a gold standard for retrospective sepsis definition)</li> <li>- At least one study at high risk of bias</li> </ul>                                                                                                                                                                                                                                                                               | <p>No up or downgrading</p> <p>↓ 1 level</p>                                              |
| <p><i>Inconsistency of results</i></p> <ul style="list-style-type: none"> <li>- No point estimates for multiple studies were computed</li> </ul>                                                                                                                                                                                                                                                                                                                                                                                                                                                                             | <p>Not available</p>                                                                      |
| <p><i>Indirectness of evidence</i></p> <ul style="list-style-type: none"> <li>- All studies included adult patients with no relevant inclusion or exclusion criteria. Exclusion and inclusion criteria based on data availability were accepted</li> <li>- At least one study with considerable differences between patients included in the studies, such as specific subpopulations</li> <li>- All settings were binned, all studies were assessed when at least 2 studies examined the same target condition</li> <li>- All studies using a retrospective definition for sepsis, severe sepsis or septic shock</li> </ul> | <p>No up or downgrading</p> <p>↓ 1 level</p> <p>No up or downgrading</p> <p>↓ 1 level</p> |
| <p><i>Imprecision</i></p> <ul style="list-style-type: none"> <li>- Confidence intervals are inconsistently reported. Due to the large sample size and narrow one sided confidence intervals (&lt;0.02) when they were reported, there were no imprecision concerns for all studies</li> </ul>                                                                                                                                                                                                                                                                                                                                | <p>No up or downgrading</p>                                                               |
